# Supplementary material
Source: PubMed Central journal article supplement (PMC5482530)

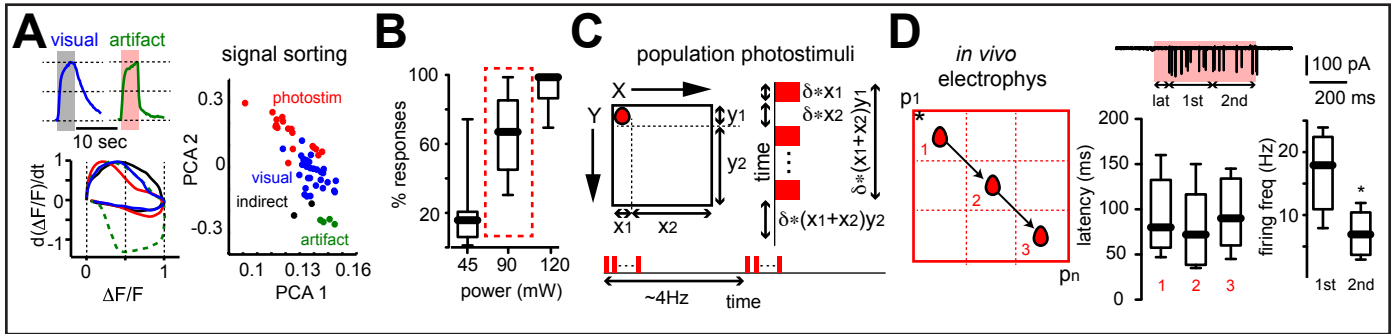

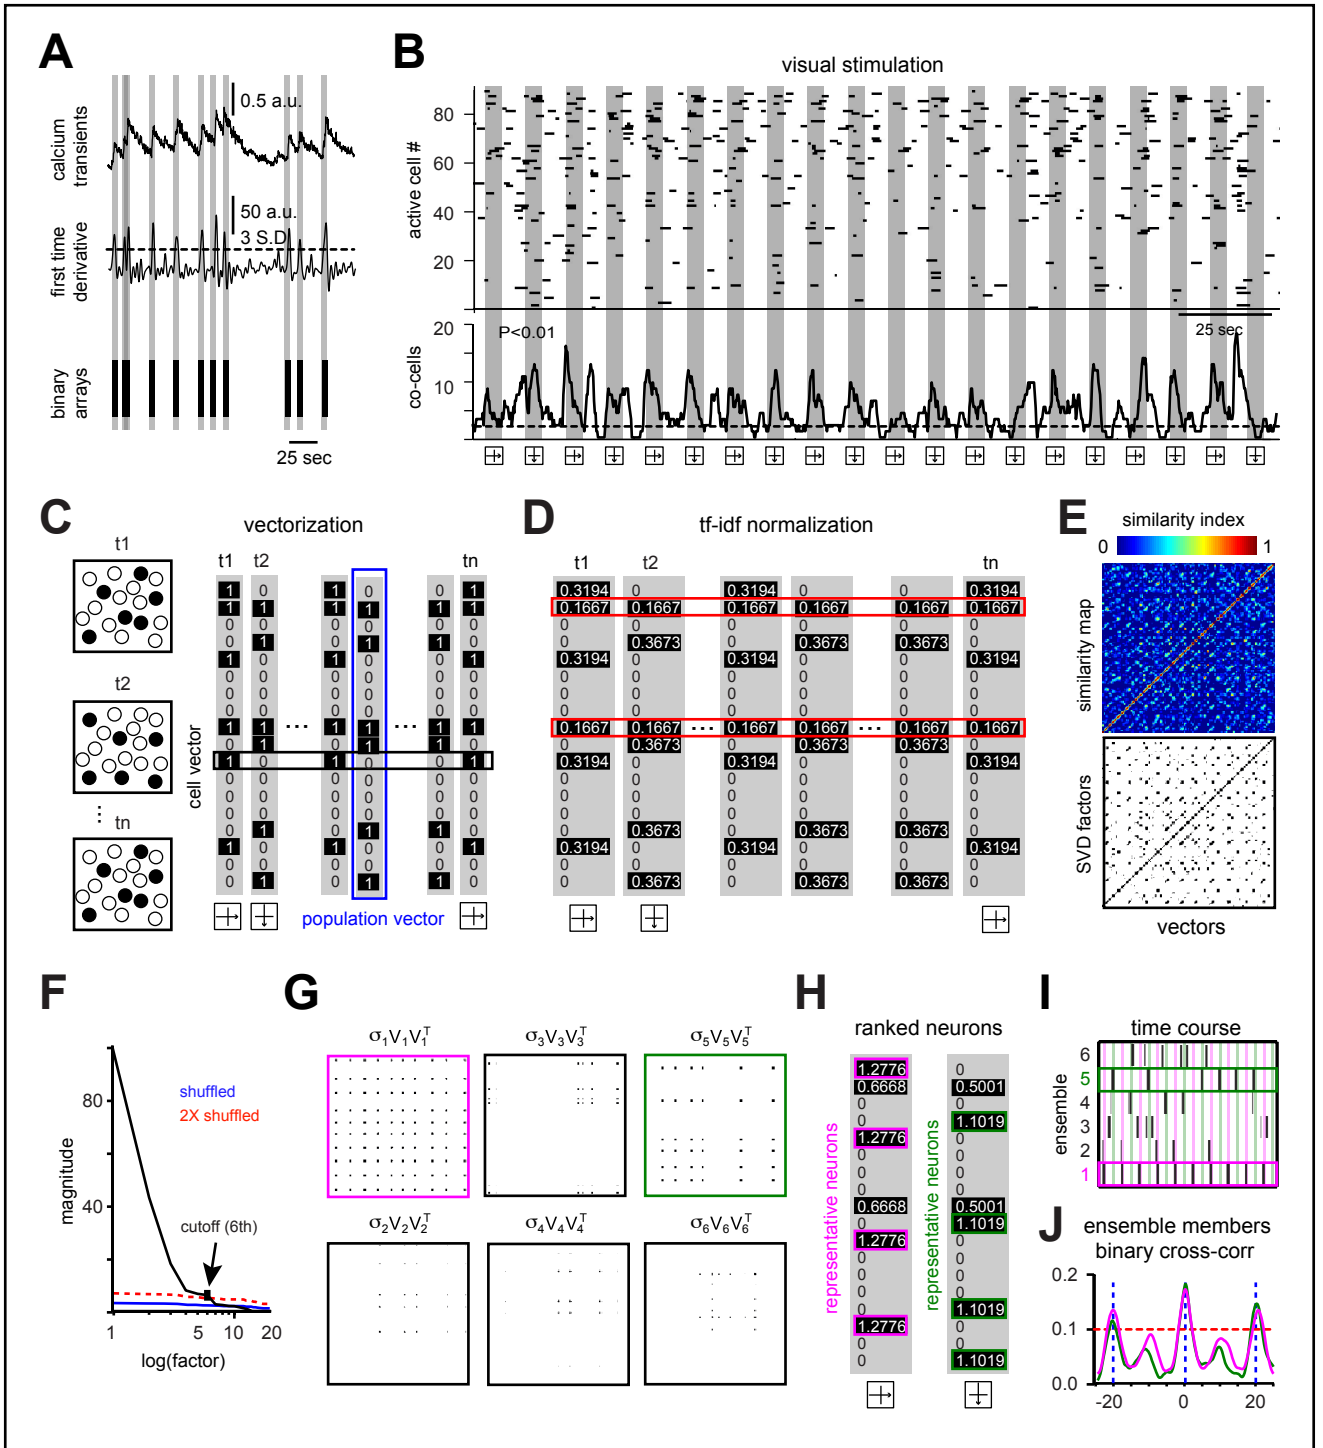

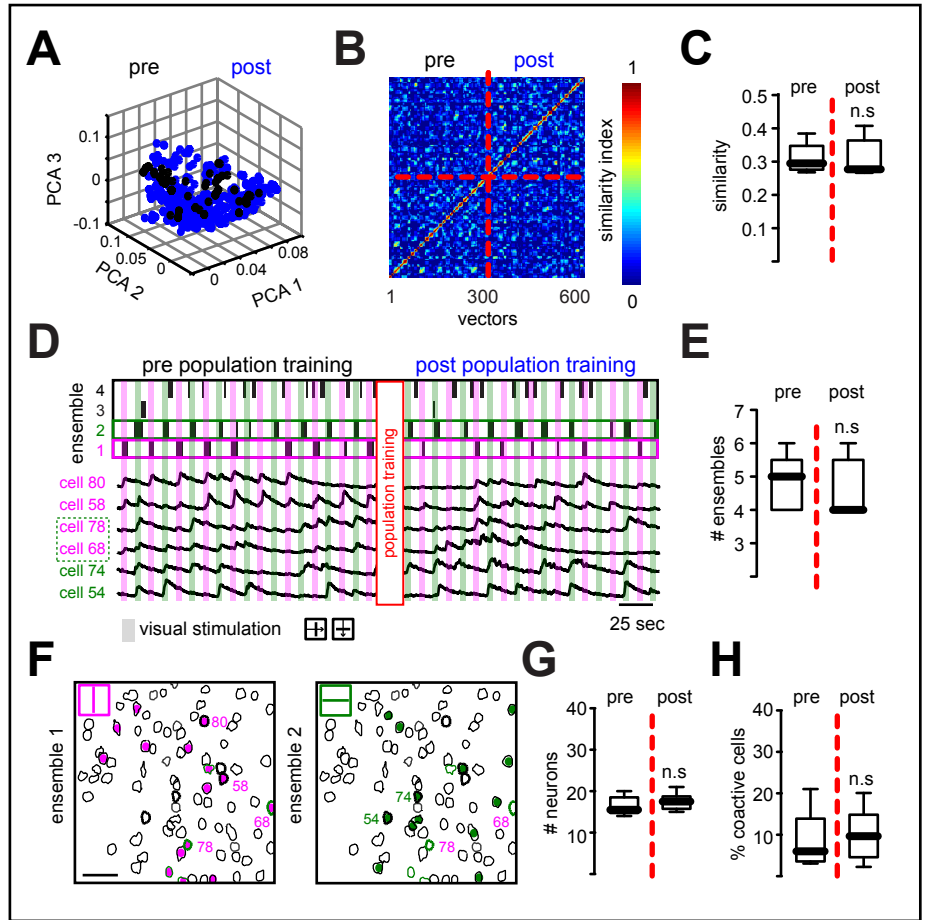

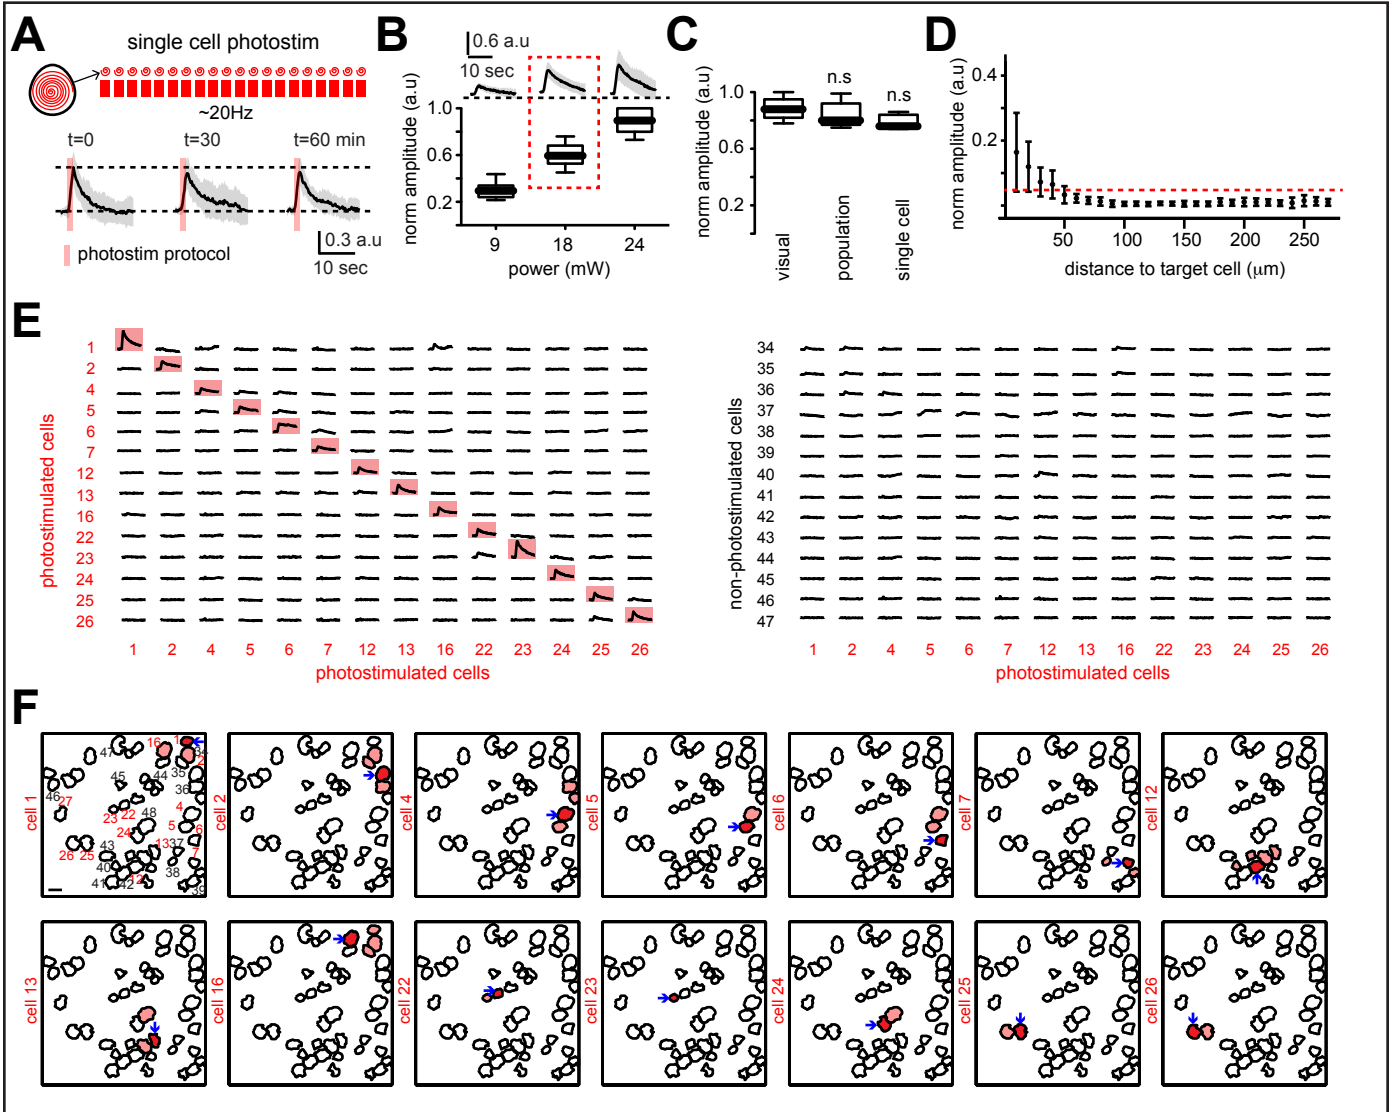

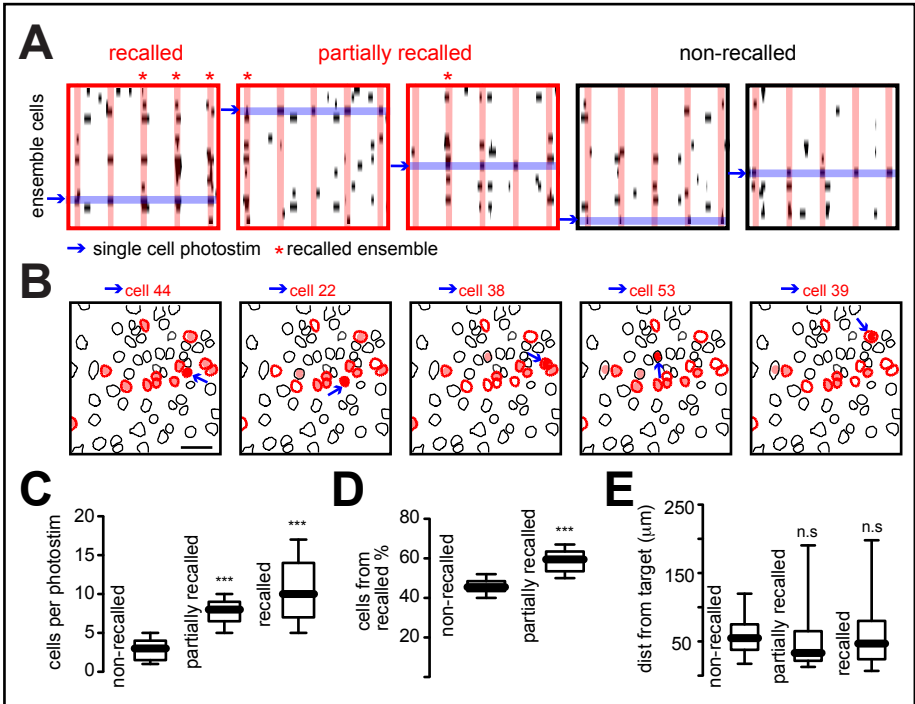

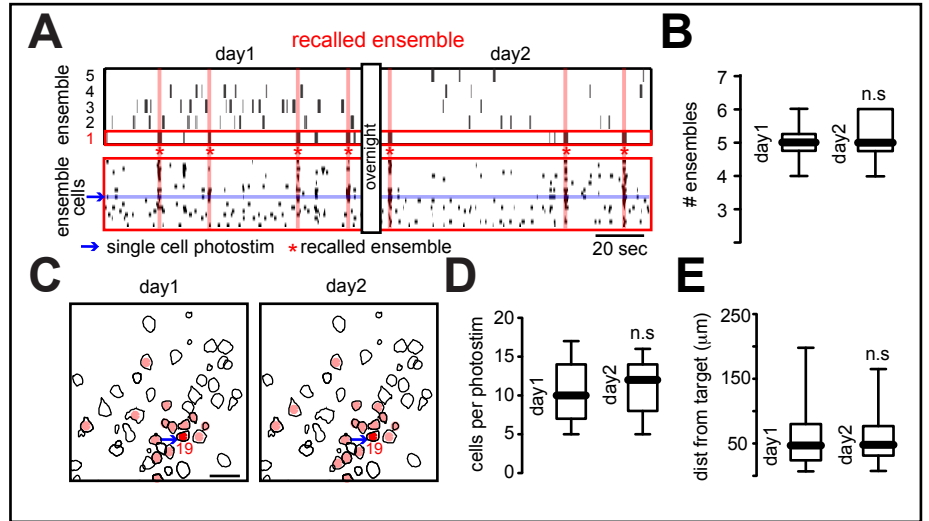

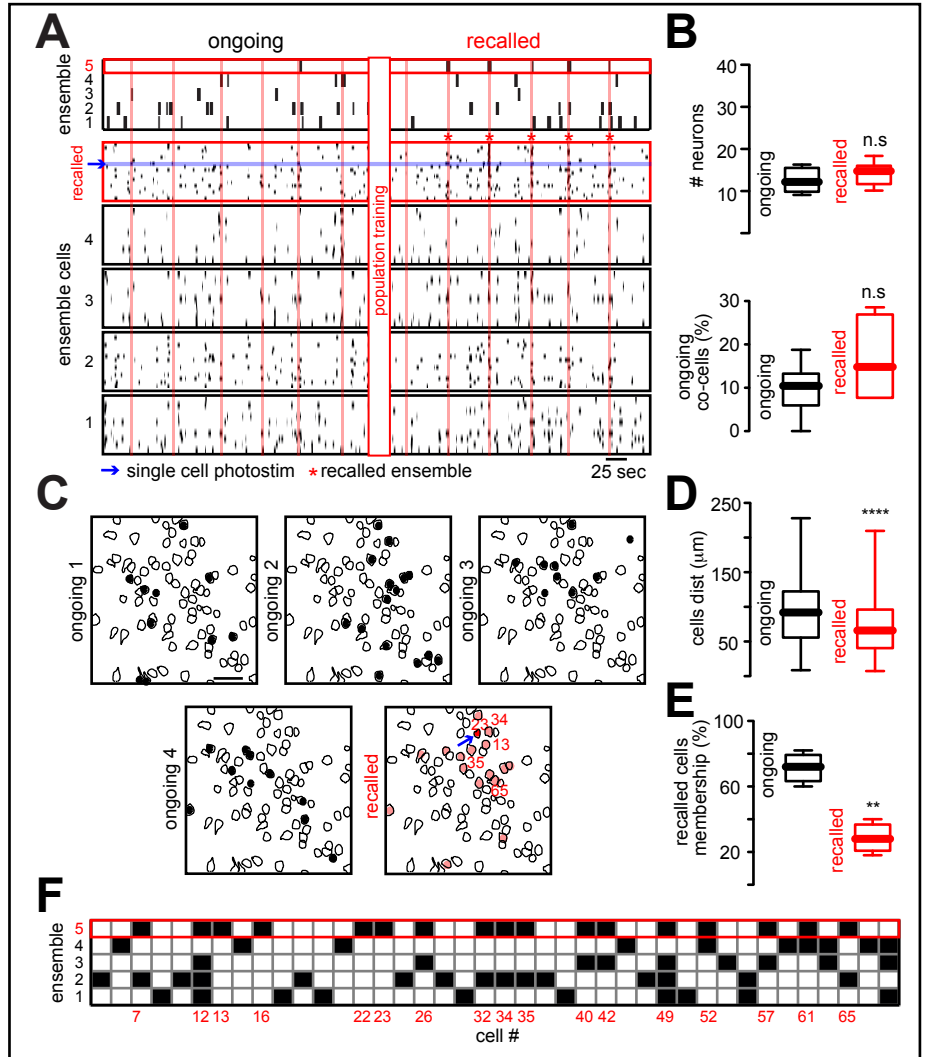

Supplement: NIHMS868868-supplement-Supplemental_Carrillo-Reid.pdf [file NIHMS868868-supplement-Supplemental_Carrillo-Reid.pdf]
